# Supplementary material for: Usenamine A triggers NLRP3/caspase-1/GSDMD-mediated pyroptosis in lung adenocarcinoma by targeting the DDX3X/SQSTM1 axis
Source: Aging (Albany NY). 2024 Jan 23;16(2):1663–84. doi: 10.18632/aging.205450 (PMC10866397; doi:10.18632/aging.205450)
Supplement: Supplementary Figures [file aging-16-205450-s001.pdf]

## SUPPLEMENTARY FIGURES

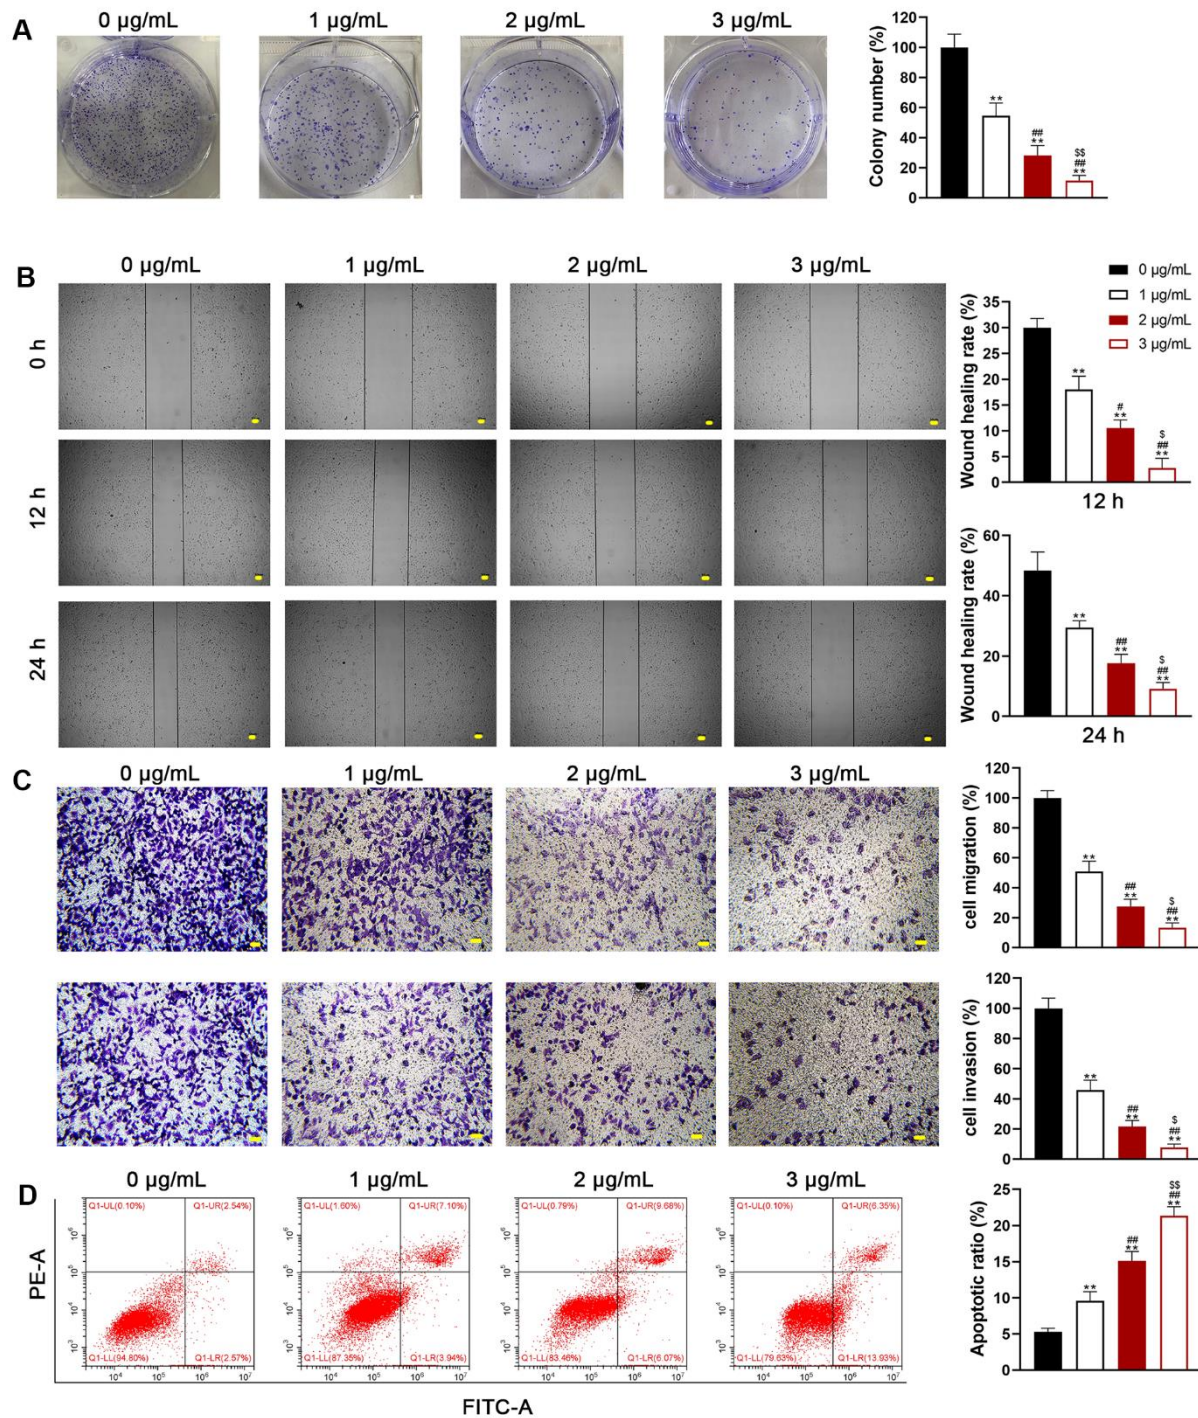

**Supplementary Figure 1. Usenamine A inhibits the proliferation, migration, and invasion of LUAD cells (A549).** (A) Cell proliferation was detected using a colony formation assay. (B) Cell migration was measured using a wound-healing assay. Scale bar = 50  $\mu\text{m}$ . (C) Cell migration and invasion were determined using the transwell assay. Scale bar = 50  $\mu\text{m}$ . (D) Cell apoptosis was assessed using flow cytometry. \*\* $p < 0.01$  vs. 0  $\mu\text{g/mL}$  usenamine A; # $p < 0.05$  and ### $p < 0.01$  vs. 1  $\mu\text{g/mL}$  usenamine A; \$ $p < 0.05$  and \$\$\$ $p < 0.01$  vs. 2  $\mu\text{g/mL}$  usenamine A.

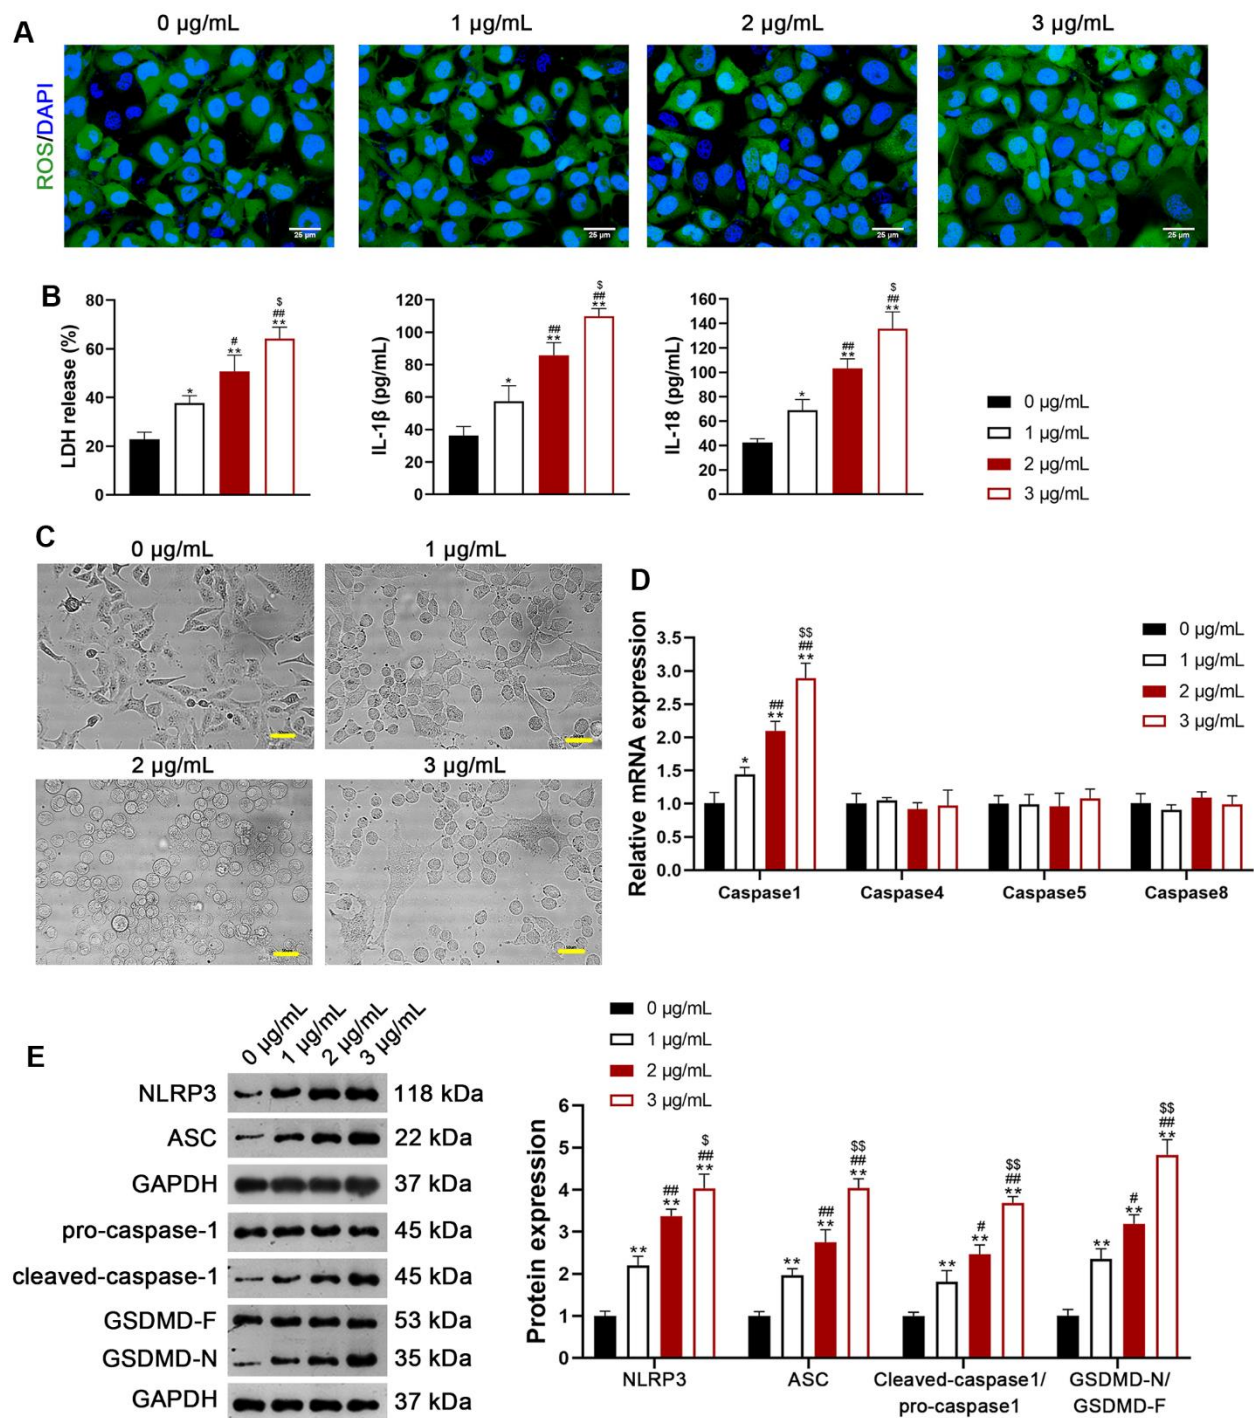

**Supplementary Figure 2. Usenamine A induces NLRP3/caspase-1/GSDMD-mediated pyroptosis in LUAD cells (A549).** (A) Levels of ROS in the cells were detected using a DCFH-DA probe. Scale bar = 25  $\mu$ m. (B) LDH, IL-1 $\beta$ , and IL-18 levels in the cells were measured using commercial ELISA kits. (C) Representative morphological images of cells obtained by microscopic examination. Scale bar = 50  $\mu$ m. (D) Relative expression of caspase-1, -4, -5, and -8 was analyzed using RT-qPCR. (E) Relative protein expression of NLRP3/caspase-1/GSDMD pathway-related proteins was measured using western blotting. \* $p$  < 0.05 and \*\* $p$  < 0.01 vs. 0  $\mu$ g/mL usenamine A; ## $p$  < 0.05 and ### $p$  < 0.01 vs. 1  $\mu$ g/mL usenamine A; \$ $p$  < 0.05 and \$\$ $p$  < 0.01 vs. 2  $\mu$ g/mL usenamine A. GSDMD, gasdermin D; LUAD, lung adenocarcinoma; NLRP3, NOD-like receptor pyrin 3; RT-qPCR, reverse transcription-quantitative PCR.
