# Supplementary material for: Usenamine A triggers NLRP3/caspase-1/GSDMD-mediated pyroptosis in lung adenocarcinoma by targeting the DDX3X/SQSTM1 axis
Source: publisher site journal article supplement (doi:10.18632/aging.205450), 2024-01-23
Supplement: Supplementary file [file aging-v16i2-205450-supplementary-material-SD2.pdf]

## SUPPLEMENTARY TABLE

**Supplementary Table 1. Primary antibodies for western blotting.**

| <b>Antibodies</b>  | <b>Catalog number</b> | <b>Supplier</b>   | <b>Working concentration</b> |
|--------------------|-----------------------|-------------------|------------------------------|
| Anti-NLRP3         | ab263899              | Abcam, UK         | 1:1,000                      |
| Anti-ASC           | DF6304                | Affinity, CA, USA | 1:1,000                      |
| Cleaved Caspase 1  | AF5418                | Affinity, CA, USA | 1:1,000                      |
| Anti-pro Caspase-1 | ab179515              | Abcam, UK         | 1:1,000                      |
| GSDMD N-Terminal   | DF13758               | Affinity, CA, USA | 1:500                        |
| GSDMD F            | AF4012                | Affinity, CA, USA | 1:1,000                      |
| DDX3X              | ab271002              | Abcam, UK         | 1:1,000                      |
| Anti-SQSTM1        | ab109012              | Abcam, UK         | 1:10,000                     |
| Anti-GAPDH         | ab245355              | Abcam, UK         | 1:10,000                     |
